1     **Sociodemographic effects on immune cell composition in a free-ranging non-**  
2                                     **human primate.**

3     Mitchell R. Sanchez Rosado<sup>1</sup>, Nicole Marzan-Rivera<sup>1</sup>, Marina M. Watowich<sup>2</sup>, Petraleigh  
4     Pantoja<sup>1,3</sup>, Melissa A. Pavez-Fox<sup>4</sup>, Erin R. Siracusa<sup>4</sup>, Eve B. Cooper<sup>5</sup>, Josue E. Negron-  
5     Del Valle<sup>6,7</sup>, Daniel Phillips<sup>6,7</sup>, Angelina Ruiz-Lambides<sup>3</sup>, Cayo Biobank Research Unit,  
6     Melween I. Martinez<sup>3</sup>, Michael J. Montague<sup>8</sup>, Michael L. Platt<sup>8,9,10</sup>, James P. Higham<sup>5</sup>,  
7     Lauren J. N. Brent<sup>4</sup>, Carlos A. Sariol<sup>1,3</sup>, Noah Snyder-Mackler<sup>6,7,11</sup>

8  
9     **Affiliations:**

10     <sup>1</sup>Department of Microbiology & Medical Zoology, University of Puerto Rico-Medical  
11     Sciences, San Juan, PR

12     <sup>2</sup>Department of Biology, University of Washington, Seattle, WA, USA

13     <sup>3</sup>Unit of Comparative Medicine, Caribbean Primate Research Center and Animal  
14     Resources Center, University of Puerto Rico-Medical Sciences Campus, San Juan, PR,  
15     USA

16     <sup>4</sup>Centre for Research in Animal Behaviour, University of Exeter, Exeter EX4 4QG, UK

17     <sup>5</sup>Department of Anthropology, New York University, New York, NY 10003, USA

18     <sup>6</sup>School of Life Sciences, Arizona State University, Tempe, AZ, USA

19     <sup>7</sup>Center for Evolution and Medicine, School of Life Sciences, Arizona State University,  
20     Tempe, AZ, USA

21     <sup>9</sup>Department of Neuroscience, University of Pennsylvania, Philadelphia, PA 19104, USA

22     <sup>9</sup>Department of Psychology, University of Pennsylvania, Philadelphia, PA 19104, USA

23     <sup>10</sup>Department of Marketing, Wharton School, University of Pennsylvania, Philadelphia,  
24     PA 19104, USA

25     <sup>11</sup>School for Human Evolution and Social Change, Arizona State University, Tempe, AZ,  
26     USA

27     Cayo Biobank Research Unit

28

29

30

## 31 **Abstract**

32 Aging results in declines in immune function and increases in inflammation, which  
33 underlie many age-related diseases. These immunosenescent signatures are similar to  
34 those seen in individuals exposed to social adversity, who may age more rapidly than  
35 those unexposed. Yet, it is unclear how social adversity alters immunity across  
36 demographic factors - data that are essential to identify how it might increase aging-  
37 related diseases. Here, we investigated how age, sex, and social adversity predicted  
38 immune cell proportions in 250 rhesus macaques living in a semi-naturalistic colony. As  
39 macaques aged, they exhibited signatures of immunosenescence. Older individuals had  
40 signatures of diminished antibody production and adaptive immunity, with declines in  
41 CD20+ B cells, CD20+/CD3+ cell ratio, and the CD4+/CD8+ T cell ratio. At all ages,  
42 females had higher CD20+/CD3+ and CD4+/CD8+ ratios, indicative of a stronger  
43 antibody and adaptive immune response that may facilitate pathogen clearance even with  
44 increasing age. Older individuals had signatures of inflammation, with higher proportions  
45 of CD3+/CD8+ Cytotoxic T cells, CD16+/CD3- Natural Killer cells, CD3+/CD4+/CD25+  
46 and CD3+/CD8+/CD25+ T regulatory cells, and CD14+/CD16+/HLA-DR+ intermediate  
47 monocytes, combined with lower levels of CD14+/CD16-/HLA-DR+ classical monocytes.  
48 Notably, we found an interaction between age and social adversity, where low-status  
49 individuals had higher proportions of CD3+/CD4+/CD25+ T regulatory cells for their age,  
50 compared to higher-status individuals. Together, our study identifies immune cell types  
51 that are affected by age and sex in the premier nonhuman primate model of human  
52 biology and behavior, and demonstrate a novel link between inflammatory CD4+ T  
53 regulatory cells and social adversity.

54

## 55 **Introduction**

56 The average human lifespan has almost doubled over the past century, leading to an  
57 increase in the prevalence of diseases of aging, like cardiovascular disease (1),  
58 autoimmune disease (2), diabetes, arthritis, and cognitive decline (3). As individuals age,  
59 there is a disruption in the homeostatic balance between innate and adaptive immunity  
60 linked to both increases in age-related disease and susceptibility to infection. This  
61 imbalance is reflective of two age-related changes, namely increased inflammation

62 (“inflammaging”) and decline in adaptive immune function (“immunosenescence”). Both  
63 changes disrupt the balance between pro-and anti-inflammatory mediators that are  
64 indicative of a healthy immune system. For example, monocytes become more  
65 proinflammatory with increasing age, releasing drivers of inflammation that include  
66 proinflammatory cytokines (4) (e.g., TNF- $\alpha$ ). Other immune cells, such as B cells and  
67 helper T cells, decline in abundance across the lifespan, which has a direct impact on  
68 long-term immunity, as evidenced by the fact that vaccination is less effective in older  
69 individuals (5).

70

71 There is substantial heterogeneity in aging, and not all individuals age at the same rate  
72 or fall victim to the same age-related diseases. For instance, some people become  
73 hypertensive in their 30s, while a 60-year-old may never suffer from this condition. Part  
74 of this heterogeneity in aging is due to sex differences in the immune system, which  
75 alter the prevalence and onset of age-associated diseases in males and females. For  
76 example, females mount a stronger immune response compared to males (6), while  
77 males have a dampened age-related increase in inflammatory cells (7). Although these  
78 studies have provided some insight into sex differences in immunological aging, there  
79 is still a lack of data demonstrating how these differences affect individuals across their  
80 lifespan and the specific cell types that contribute to these differences.

81

82 Heterogeneity in aging can also be attributed to life experiences, such as exposure to  
83 social adversity, which can influence the onset and progression of disease and, ultimately,  
84 mortality (8). Social adversity has been linked to accelerated aging as measured using  
85 biomarkers like epigenetic age and telomere attrition (9, 10). There are also broad  
86 similarities between the effect of age and social adversity on peripheral immune function  
87 (11). For instance, early life adversity in humans has been linked to increases in  
88 proinflammatory T cells (12) – a characteristic usually seen with increasing age. However,  
89 it is still unclear if and how social adversity alters immune function across the life course  
90 - data that are essential to identifying how social adversity might lead to increased aging-  
91 related disease and death, or, conversely, how social advantage can help protect an  
92 individual from the effects of aging. Taken together, there is mounting evidence that social

93 adversity accelerates the pace of biological aging and is a possible driver of interindividual  
94 variability in morbidity and mortality.

95

96 Because social structures in human populations are affected by characteristics such as  
97 economic advantages/disadvantages, discrimination, and sociocultural differences, it is  
98 difficult to measure how social adversity “gets under the skin” to affect immune and overall  
99 health, as these may have an impact on how an individual perceives and responds to  
100 their social environment. Rhesus macaques (*Macaca mulatta*), a non-human primate, are  
101 an established animal model that exhibits aging trajectories similar to humans - such as  
102 decreases in mobility with increasing age and physical changes like coat greying and skin  
103 atrophies - but compressed into a lifespan 3-4x times shorter (13). This is also reflected  
104 at the molecular level: rhesus macaques and humans show similar age-related changes  
105 in immune cell DNA methylation and gene expression (14). Additionally, rhesus  
106 macaques are an ideal model to study the effects of social adversity because of their  
107 complex social structure. Differences in social status result in differences in the extent to  
108 which individuals can access resources (15), which is a feature also commonly seen in  
109 human populations. Like humans, social status in macaques affects health and survival  
110 (16), with individuals that have more social connections presenting lower white blood cells  
111 (17)—possibly affecting inflammatory responses.

112

113 Here, we characterized the immunological effects of aging and quantified whether social  
114 adversity recapitulates or interacts with these effects. We studied a free-ranging  
115 population of rhesus macaques living on the island of Cayo Santiago, Puerto Rico where  
116 we could simultaneously measure the effects of aging, sex, and social adversity in a semi-  
117 naturalistic social setting with minimal human intervention. Using objective measures of  
118 social adversity, we were able to avoid some of the biases that sometimes affect studies  
119 of humans that rely on self-reporting and questionnaires (18, 19). We identified which  
120 immune cell proportions exhibit age-associated changes, how these proportions are  
121 affected by sex and social adversity, and if/how the social adversity-induced changes  
122 recapitulate the immunological changes seen during aging.

123

124 **Methods**

125 *Study population:*

126 Cayo Santiago, an island located off the southeast coast of Puerto Rico, is inhabited  
127 by 1,800 rhesus macaques living in an easily accessible and semi-natural setting. The  
128 monkeys are direct descendants of rhesus macaques introduced from India in 1938. The  
129 population has a minimal intervention policy managed by the Caribbean Primate  
130 Research Center (CPRC), and is the longest-running primate field station in the world  
131 (20). It provides unique research opportunities for studies of behavior, physiology,  
132 demography, morphology, and genomics. There are no predators on the island, and the  
133 most common causes of death are due to senescence. During the annual trap-and-  
134 release period, researchers have the unique opportunity to collect biological and  
135 morphological samples with the assistance of the CPRC veterinary staff. Over the last 10  
136 years, the Cayo Biobank Research Unit (CBRU), has established the ability to collect  
137 behavioral data; access to these data provides a unique opportunity to probe the  
138 relationships between the social environment, immune function, and aging.

139

140 *Blood sampling:*

141 In October - December 2019 and October 2020 - February 2021, we collected whole  
142 blood from sedated rhesus macaques (n=97 in October - December 2019 and n=153 in  
143 October 2020 - February 2021) into 6ml K2 EDTA tubes (Beckton, Dickson and Company,  
144 cat #367899). We sampled a total of 250 animals (115 females; 135 males) spanning  
145 their natural lifespan (mean age = 11.05 years, range 0-28 years; **Figure 1A**). Fresh blood  
146 samples were transported at 4C to the UPR-Medical Sciences campus where flow  
147 cytometric analysis was performed within 6 hours of sample collection.

148

149 *Antibodies and flow cytometric analysis:*

150 We used an 8-panel antibody cocktail consisting of the following antibodies: CD20-  
151 PacBlue/Clone 2H7 (Biolegend), CD3-PerCP/Clone SP34-2 (BD), CD4-APC/Clone L200  
152 (BD), CD8-Viogreen/Clone BW135/80 (Miltenyi), CD25-PE/Clone 4E3 (Miltenyi), CD14-  
153 FITC/Clone M5E2 (BD), CD16-PEVio770/Clone REA423 (Miltenyi), HLA-DR-  
154 APCVio770/Clone REA805 (Miltenyi).

155

156 We performed phenotypic characterization of rhesus macaque peripheral blood  
157 mononuclear cells (PBMCs) using multicolor flow cytometry with direct  
158 immunofluorescence (View **S. Figure 3** for gating strategy and **Table S1** for Ab panel) on  
159 all 250 animals. Aliquots of 150  $\mu$ l of heparinized whole blood were incubated with a mix  
160 of the antibodies described for 30 minutes at 25C (room temperature). After incubation,  
161 red blood cells were fixed and lysed with the BD FACS fix and lyse solution (Cat  
162 #349202). Cells were washed twice using PBS containing 0.05% BSA at 1,700 RPM for  
163 5 minutes and processed in a MACSQuant Analyzer 10 flow cytometer (Miltenyi Biotec,  
164 CA).

165

166 Lymphocytes (B cells, T cells, NK cells) and monocytes (classical and non-classical) were  
167 gated based on their characteristic forward and side scatter patterns. Lymphocytes were  
168 then further subdivided based on their cell surface markers. NK cells were defined as the  
169 CD3- and CD16+ population; B cells were defined as CD20+ population; and T cells as  
170 the CD3+ population. We further subdivided T cells from the CD3+ gate into CD4+ and  
171 CD8+ populations. CD4+CD25+ and CD8+CD25+ T regulatory cells were further gated  
172 from the CD4+ and CD8+ gates. Monocytes were gated based on the combined  
173 expression of the HLA-DR/CD14 markers for classical monocytes, HLA-DR/CD16  
174 markers for non-classical monocytes, and HLA-DR/CD14/CD16 for intermediate  
175 monocytes (**S. Figure 4**). Data analysis was performed using Flowjo version 10.7.1  
176 (FlowJo LLC Ashland, OR).

177

178 To get an accurate representation of cell-type proportions, we counted only stained  
179 events from the cells of interest and calculated their proportions based on lymphocytes  
180 and monocytes subsets. To calculate cell ratios, such as CD20 + B cell to CD3+ T cell  
181 ratio and CD4+ T cell to CD8+ T cell ratio, we divided the calculated proportion of these  
182 cell types across each individual sample (e.g., CD20+ B cell/ CD3+ T cell and CD4+/CD8+  
183 respectively). (Calculations detailed in **Table S2**).

184

185

186 *Quantification of social adversity (social status):*

187 Social status of individuals was determined using the outcome of win-loss interactions  
188 between pairs of adult groupmates. Observations of behaviors of adults (6+ years old)  
189 were collected from two different social groups, groups V and F, in the year leading up  
190 to sample collection. In 2019, behavioral data were collected using a previously  
191 established 10-minute focal sampling protocol (21). Briefly, the protocol consisted of  
192 recording state behaviors (e.g. resting, feeding) and agonistic encounters, which  
193 included recording the identity of the focal animal's social partner. Win-loss agonistic  
194 interactions included threat and submissive behaviors, along with contact and non-  
195 contact aggression. In 2020, agonistic interactions were collected *ad-libitum* due to  
196 COVID-19 pandemic restrictions. A total of 370 hours of behavioral data were collected  
197 for group V in 2019. In 2020 in group F we collected a total of 407 female-female  
198 agonistic interactions and 292 male-male interactions, while in group V we collected 170  
199 female-female agonistic interactions and 153 male-male interactions.

200

201 Social status was computed by group for each year and independently for males and  
202 females (22, 23). In rhesus macaques, social status is obtained differently for males and  
203 females (24), with females forming maternally inherited stable linear hierarchies, while  
204 males typically disperse from their natal group and enter a new group where they attain  
205 rank by physical contest and queuing (25, 26). Hierarchies were built using the win-loss  
206 outcomes of agonistic encounters from focal sampling and *ad-libitum* observations, and  
207 known maternal relatedness was used to settle behavioral gaps in the female hierarchy  
208 (27). To control for group size variation, dominance rank was calculated as the  
209 percentage of same-sex group peers that a subject outranked; a score above 80%  
210 corresponded to high-ranking animals, scores from 50-79% to medium ranking animals  
211 and scores below 49% to low ranking animals (28). Overall, we were able to quantify  
212 circulating immune cell proportions in 140 macaques (71 F and 69 M) for which we had  
213 behavioral data.

214

215

216 *Statistical analysis:*

217 Statistical analyses were performed using R Studio version 4.0.1. software (RStudio,  
218 PBC, Boston, MA, USA).

219 Using all 250 samples, we performed principal component analysis of all the measured  
220 cell types using the *prcomp* function in RStudio. We then employed a linear mixed-effects  
221 model using the *lmerTest* R package to model sample projections onto principal  
222 components as a function of age, sex, and sample period (to control for any technical  
223 factors that might vary across the two sampling periods), while including individual ID as  
224 a random effect to account for repeated samples from the same individual.

225

226 To evaluate each cell type at a more granular level, we employed the same linear mixed-  
227 effects to model the proportion of each cell type and certain cell-type ratios (e.g.,  
228 CD4+/CD8+) as a function of age, sex, and sample period. We also included an  
229 interaction between age and sex to identify sex-dependent age-related associations. For  
230 the subset of samples where social status information was available ( $n = 140$ ), we also  
231 modeled cell proportions as a function of social status (rank), age, sex, and sample  
232 period, again with individual ID as a random effect. We also included an interaction  
233 between rank and age as well as for rank and sex to test if changes in the relationship  
234 between cell type proportion and social status were dependent on either of these  
235 variables.

236

## 237 **Results**

### 238 **Free-ranging macaques exhibit immunosenescence and inflammaging**

239 Age was the strongest predictor of immune cell composition in our dataset, and was  
240 significantly associated with the first principal component of immune cell composition  
241 ( $\beta_{PC1} = 0.13$ ,  $p = 4.3 \times 10^{-15}$ , **Figure 1B**). Individuals with more positive PC1 values had  
242 higher proportions of cytotoxic T cells and NK cells and lower proportions of cells involved  
243 in pathogen clearance, including CD20+ B cells and classical monocytes (**Figure 1C**).  
244 Overall, this suggests a pattern of increased inflammation and immunosenescence with  
245 increasing age.



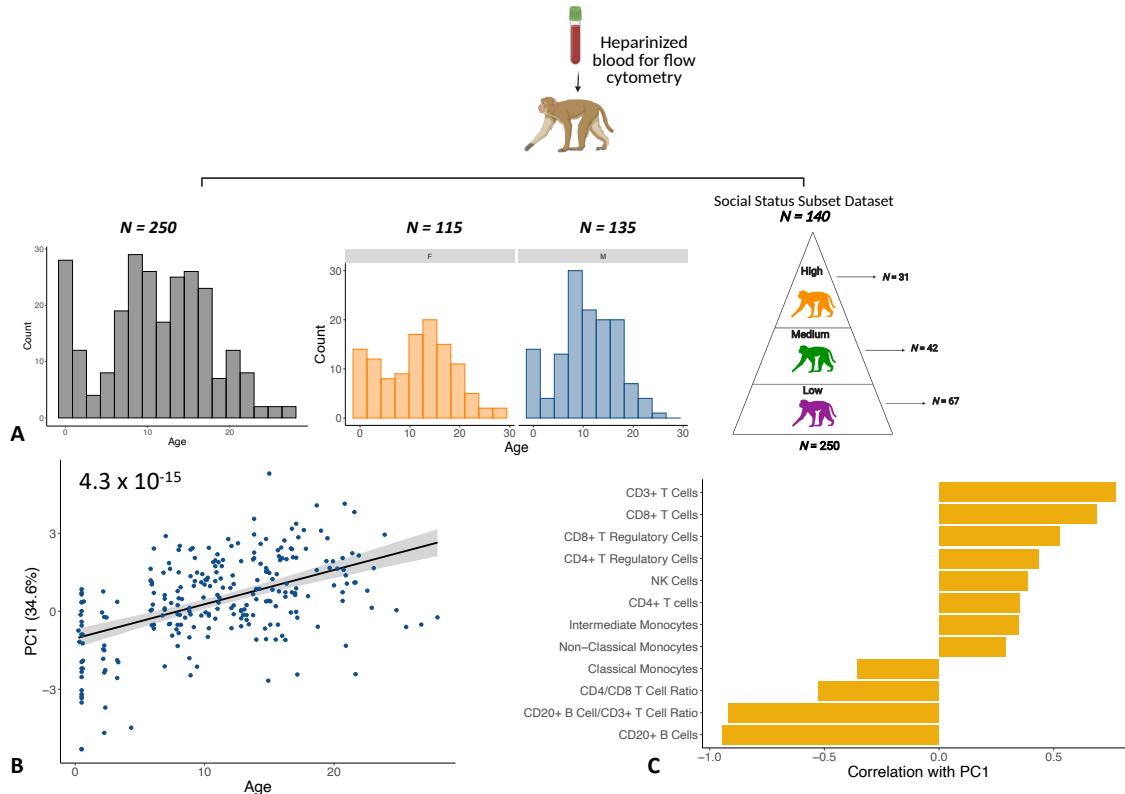

261

262 **Figure 1: Sample collection and demographics. A)** We collected whole blood samples  
263 from 250 animals and quantified immune cell proportions using flow cytometry. The  
264 dataset was roughly balanced between males and females and captured the entire  
265 natural lifespan of macaques in this population. We calculated social status by assigning  
266 dominance ranks to 140 animals using observational data collected in the year before  
267 each sample was collected. Animals were assigned to one of three dominance ranks:  
268 high (n = 31), medium (n = 42) and low (n = 67). The social status dataset is a subset of  
269 the original age dataset because behavioral data were not available for all study animals.  
270 **B)** PC1 of immune cell compositions is significantly associated with age ( $\beta_{PC1} = 0.13$ ,  $p =$   
271  $4.3 \times 10^{-15}$ ). **C)** The T cell compartment is positively associated with PC1 (and thus age),  
272 while the B cell compartment is negatively associated with PC1 of immune cell  
273 composition.

274

275 We then conducted a more granular analysis of what factors predicted individual cell  
276 proportions (**Table S3**). Age was significantly associated with signatures of

277 immunosenescence in adaptive immune cells, characterized by a significant decrease in  
278 the CD20+ B cell to CD3+ T cell ratio ( $\beta_{\text{CD20:CD3}} = -0.03 \pm 0.004$ ,  $p = 2.3 \times 10^{-9}$ , **Figure**  
279 **2A**). This change was largely driven by age-related declines in the proportion of CD20+  
280 B cells ( $\beta_{\text{CD20}} = -0.87 \pm 0.11$ ,  $p = 1.8 \times 10^{-12}$ , **Figure 2B**). Age was also associated with a  
281 slight decrease in the relative proportion of CD4+ T helper cells (**S.Figure 1**), and when  
282 paired with an age-associated increase in cytotoxic CD8+ T cells ( $\beta_{\text{CD8}} = 0.60 \pm 0.09$ ,  $p =$   
283  $1.4 \times 10^{-10}$ , **Figure 2C**), there was a strong and significant age-associated decline in the  
284 CD4+/CD8+ ratio ( $\beta_{\text{CD4:CD8}} = -0.06 \pm 0.008$ ,  $p = 1.9 \times 10^{-13}$ , **Figure 2D**).

285

286 We then examined less common, but extremely immunologically important, regulatory T  
287 cell populations (CD25+) that are involved in immunity suppression and maintenance of  
288 self-tolerance (29). Proportions of both CD4+ and CD8+ T regulatory cells increased  
289 significantly with age (CD3+CD4+CD25+:  $\beta = 0.11 \pm 0.02$ ,  $p = 2.4 \times 10^{-9}$ , **Figure 2E**;  
290 CD3+CD8+CD25+:  $\beta = 0.01 \pm 0.005$ ,  $p = 5.8 \times 10^{-3}$ , **Figure 2F**). Innate immune system  
291 cells also showed significant changes with age, with two monocyte populations presenting  
292 weak, but differing age-related changes in abundance.

293

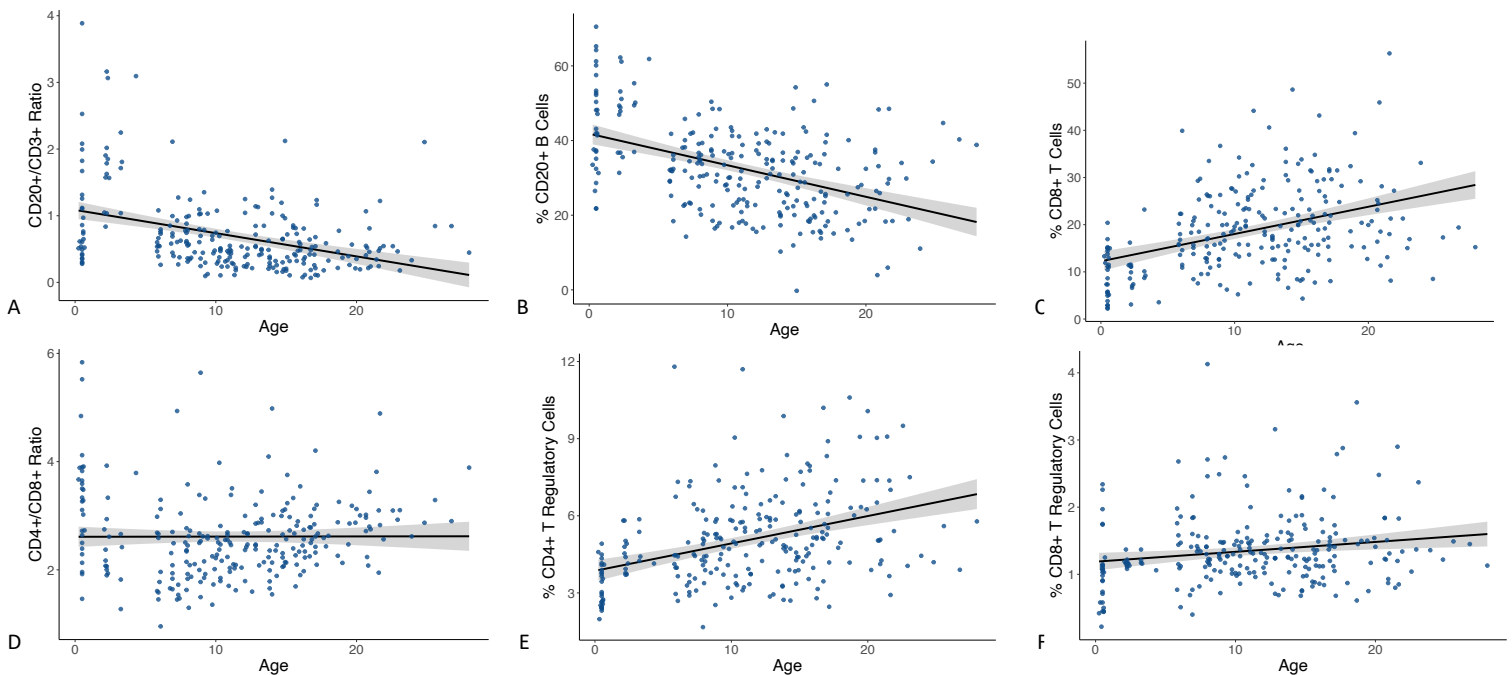

294 **Figure 2: Adaptive immune cell proportions are associated with age. A) CD20+ B**  
295 **cell to CD3+ T cell ratio decreases across the life-course ( $\beta_{\text{CD20:CD3}} = -0.03 \pm 0.004$ ,  $p =$**

296  $2.3 \times 10^{-9}$ ), and **B**) CD20+ B cells decrease across the life-course ( $\beta_{CD20} = -0.87 \pm 0.11$ ,  
297  $p = 1.8 \times 10^{-12}$ ). **C**) CD8+ T cells increase with age ( $\beta_{CD8} = 0.60 \pm 0.09$ ,  $p = 1.4 \times 10^{-10}$ ).  
298 **D**) CD4+/CD8+ T cell ratio decreases with age ( $\beta_{CD4:CD8} = -0.06 \pm 0.008$ ,  $p = 1.9 \times 10^{-13}$ ).  
299 **E**) CD4+ T regulatory cells ( $\beta = 0.11 \pm 0.02$ ,  $p = 2.4 \times 10^{-9}$ ) and **F**) CD8+ T regulatory cells  
300 increase with age ( $\beta = 0.01 \pm 0.005$ ,  $p = 5.8 \times 10^{-3}$ ), possibly because of higher baseline  
301 levels of inflammation in the older population (i.e., inflammaging).

302

303

304 Classical monocytes (HLA-DR+/CD14+/CD16-), which are involved in phagocytosis and  
305 extracellular pathogen clearance (30), decreased with age ( $\beta = -0.49 \pm 0.22$ ,  $p = 0.03$ ,  
306 **figure 3A**), while intermediate monocytes (HLA-DR+/CD14+/CD16+), involved in  
307 immune cell recruitment and secretion of pro-inflammatory cytokines (30), increased with  
308 increasing age ( $\beta = 0.31 \pm 0.13$ ,  $p = 0.02$ , **Figure 3B**). The proportion of CD16+CD3- NK  
309 cells – which have a similar role to CD8+ T cells presenting natural cytotoxicity but are  
310 non-antigen specific – also increased significantly with age ( $\beta = 0.35 \pm 0.10$ ,  $p = 3.2 \times 10^{-4}$ ,  
311 **Figure 3C**). Together, these changes indicate an age-related decline in adaptive  
312 immunity paired with an increase in inflammation profile by innate immune cells,  
313 potentially disrupting a “healthy” homeostatic immune system.

314

315

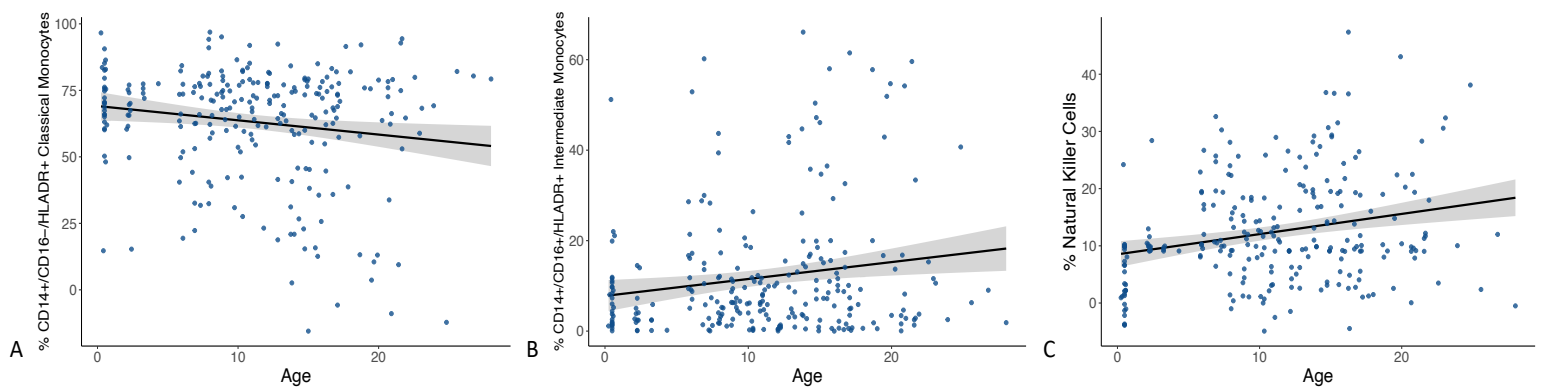

316 **Figure 3: Age is associated with changes in innate immune cell proportions. A)**  
317 **CD16+ NK cell increase with age ( $\beta_{CD3-CD16+} = 0.35 \pm 0.10$ ,  $p = 3.2 \times 10^{-4}$ ) B)**  
318 **CD14+/CD16-/HLADR+ Classical monocytes ( $\beta_{CD14++} = -0.49 \pm 0.22$ ,  $p = 0.03$ )**  
319 **decrease and C) CD14+/CD16+/HLADR+ intermediate monocytes increase with age**

320 ( $\beta_{\text{CD14+CD16+}} = 0.31 \pm 0.13$ ,  $p = 0.02$ ), suggesting decreases in phagocytosis, pathogen  
321 clearance and increases in inflammation with increasing age.

322

### 323 **Sex differences in immunity**

324 We found sex differences in CD4+ T cells ( $\beta_{\text{CD4}} = -2.11 \pm 1$ ,  $p = 0.04$ , **Figure 4A**), with  
325 females having higher proportions than males. Additionally, there was a significant sex  
326 difference in the CD4+/CD8+ ratio ( $\beta_{\text{CD4:CD8}} = -0.23 \pm 0.10$ ,  $p = 0.03$ , **Figure 4B**), with  
327 males having a lower CD4+ to CD8+ ratio. These differences between the sexes are  
328 representative of a stronger adaptive immune response in females, which, in part, is  
329 generated by CD4+ T helper cells. There were no significant interactions between age  
330 and sex on any immune cell proportion.

331

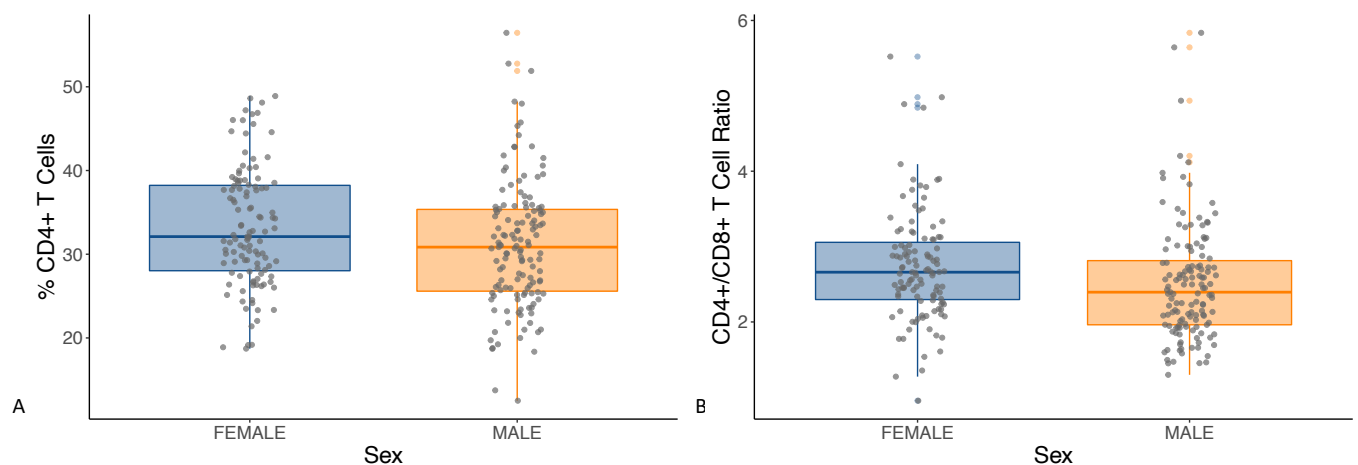

332 **Figure 5: Sex differences in T cell proportions.** **A)** percent of CD4+ T cells and **B)** the  
333 CD4+/CD8+ T cells ratio show significant sex differences ( $\beta_{\text{CD4}} = -2.11 \pm 1$ ,  $p = 0.04$  and  
334  $\beta_{\text{CD4:CD8}} = -0.23 \pm 0.10$ ,  $p = 0.03$  respectively). Females have, on average, had higher  
335 proportions of both measurements.

336

337

### 338 **Social adversity is associated with lymphocyte proportions**

339 Contrary to our expectations—where we expected that low social status would exhibit  
340 similar effects on immune cell proportions as aging—we found no significant main effects

341 of social status on lymphocyte proportions. However there was a significant interaction  
342 between age and social status on the proportion of CD4+CD25+ T regulatory cells, where  
343 the age-associated increase in CD4+ Tregs became stronger in lower status animals  
344 ( $\beta_{\text{status*age}} = 0.096 \pm 0.045$ ,  $p = 0.035$ ; **Figure 5**).

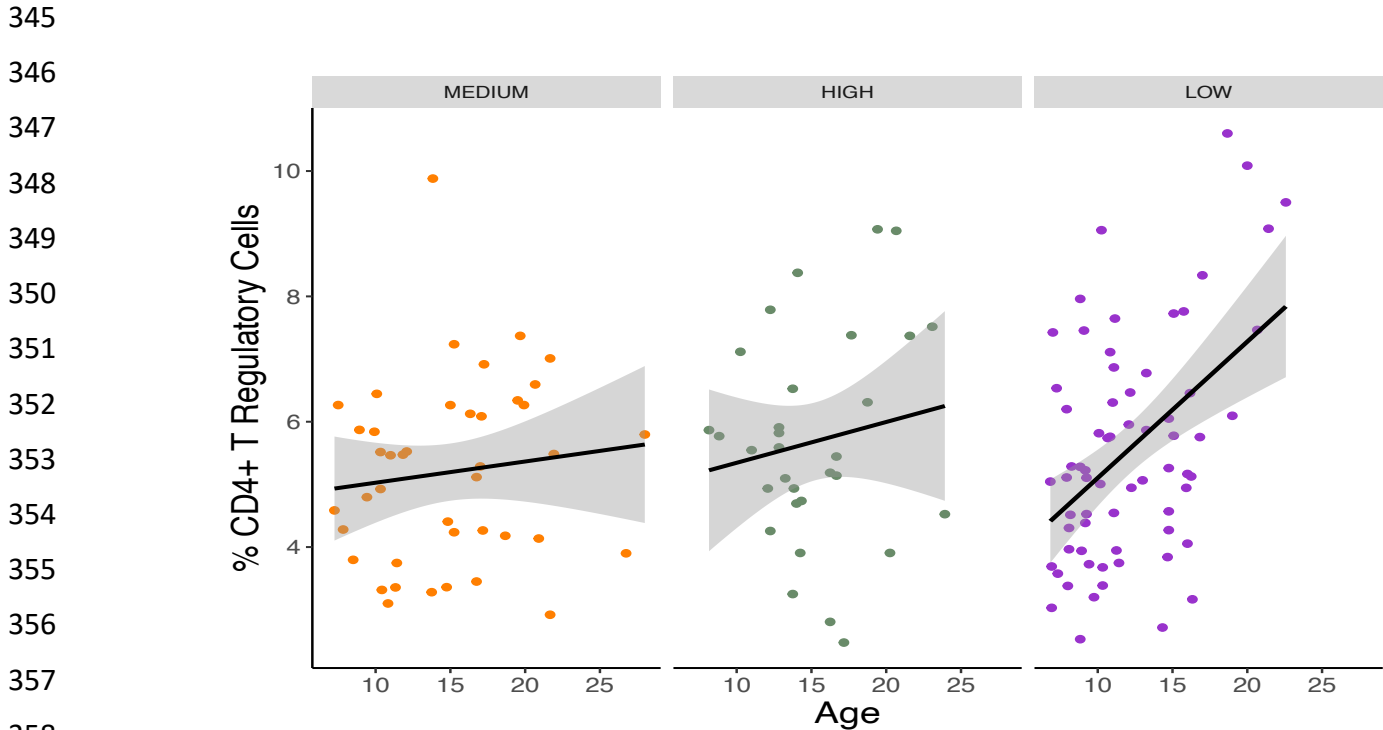

358

359 **Figure 5: Low social status individuals exhibit accelerated inflammaging.**

360 Interaction between social status and age, such that the effect of age on CD4+ T  
361 regulatory cell proportions is strongest in lower status individuals ( $\beta_{\text{status*age}} = 0.096 \pm$   
362  $0.045$ ,  $p = 0.035$ ). Status has been split into three groups (low, medium, and high) for  
363 visualization purposes.

364

### 365 Discussion

366 We found that age was associated with a range of changes in immune cell populations in  
367 a naturalistic colony of nonhuman primates—an important animal model for human aging.  
368 Intriguingly, we also identified social status-dependent age-related changes in T  
369 regulatory cells. Together these changes likely shape immune responses to future  
370 pathogenic challenges as well as the development of inflammatory-related diseases.  
371 Generally, macaques exhibited age-related changes similar to those seen in human

372 populations, including declines in lymphocytes (31). Here, we identified more specific cell  
373 types that changed in frequency with age. We detected age-associated declines in  
374 CD20+ B cells, which are responsible for antibody production and pathogen clearance  
375 and are a key cell in the generation of immune memory, reflecting immunosenescence.  
376 A weakened B cell response is one of the main factors why vaccination is less effective  
377 in older populations (32). B cells have also been associated with protection against certain  
378 types of cancers, such as lung cancer (33). Together, decreases in B cells, decreased B  
379 cell to T cell ratios, and increases in T cells in older individuals (**S. Figure 3**) reflect  
380 changes in the adaptive immune response that likely reduces the ability to effectively clear  
381 pathogens.

382  
383 Similar to two other studies in captive macaques, we found that CD8+ T cell proportions  
384 increased with age (34, 35). Notably, this differs from findings in humans where both  
385 CD8+ T cells and their effector (i.e., response to stimulus) responses decrease  
386 significantly with age (36). This discrepancy may be due to the fact that CD8+ T cells tend  
387 to have significantly more rounds of division than CD4+ T cells (37), possibly resulting in  
388 higher proportions of these cells in individuals of older age – when usually general cell  
389 division rates decrease, providing CD8+ T cells with an opportunity to present higher  
390 proportions than cells that do not have fast division cycles. Alternatively, since CD8+ T  
391 cell subsets have been associated with inflammation and ‘inflammaging’ (38), there is a  
392 possibility that the increase in the general pool of CD8+ T cells in rhesus macaques is  
393 indicative of higher levels of inflammation. This is further supported by the decrease with  
394 age of the CD4+/CD8+ T cell ratio, which reflects the increase in CD8+ T cells with age  
395 along with possible increases in inflammation. Furthermore, proportions of NK cells  
396 significantly increased across the life-course in our dataset. Similar to CD8+ T cells, NK  
397 cells respond to intracellular pathogens, secrete multiple pro-inflammatory mediators and  
398 are crucial during tumor surveillance and injury repair. Increases in NK cells suggest a  
399 higher incidence of inflammation and/or tissue injury in the older population. As expected,  
400 CD4+CD25+ T regulatory cells as well as CD8+CD25+ T regulatory cells increased with  
401 age, indicating higher levels of inflammation in older individuals (39). These results, along  
402 with decreases in B cell and increases in CD8+ T cell and NK cell proportions, further

403 support the hypothesis that the adaptive immune response in rhesus macaques declines  
404 with age and inflammation related factors may increase due to ‘inflammaging’. Together,  
405 these changes may drive biological and physiological decline that leads to higher risk of  
406 morbidity and mortality, as in humans.

407

408 Monocyte proportions also changed with age. Specifically, we found a decrease in the  
409 proportions of CD14+ classical monocytes, which are phagocytic cells that ingest  
410 pathogens that they encounter (40). This age-associated decrease may indicate a  
411 dampened phagocytic response, and thus an increased likelihood of infection in older  
412 individuals. This decrease in classical monocytes was accompanied by an increase in the  
413 proportion of CD14+/CD16+ intermediate monocytes, which are strongly associated with  
414 inflammation (41). For instance, increases in this cell type have been linked to disorders  
415 such as chronic kidney disease (42). The decrease in classical monocytes paired with an  
416 increase in intermediate monocytes represent yet another signature of  
417 immunosenescence and inflammaging.

418

419 We also identified important sex-differences in cells linked to adaptive immune cell  
420 populations. Females had more CD4+ T cells across the life-course compared to males,  
421 which recapitulates changes seen in humans (43). Furthermore, we found sex specific  
422 differences in the CD4+/CD8+ T cell ratio, with males having a lower ratio across the life-  
423 course than females. CD4+ T cells aid in the affinity maturation process that results in the  
424 production of antibodies in the lymph nodes (44). Thus, their higher abundance in females  
425 across the life-course, which is also reflected in a lower CD4+/CD8+ ratio for males, may  
426 be linked to a better and more effective antibody response and thus adaptive immune  
427 protection in females against invading pathogens (45).

428

429 A strength of our study was the ability to quantify measures of social adversity (i.e.,  
430 dominance rank), and to test if and how social status altered age-related immune  
431 changes. Contrary to our expectations, we found no main effect of social status on the  
432 abundance of any immune cell population when controlling for age and sex. This may be  
433 due to the fact that we only had behavioral data, and thus social status measures, for a

434 subset of adults in our dataset (n = 140). Nevertheless, we did detect a strong interaction  
435 between age and status on the proportion of the inflammatory CD4+ T regulatory cells.  
436 CD4+ T regulatory cells increased with age, but this increase was strongest in those  
437 individuals on the bottom of the social hierarchy, which typically experience the most  
438 social adversity. Thus, older individuals exhibited the strongest increase in these  
439 inflammatory cells if they were also low social status. This finding points to the age-  
440 dependence of some effects of social adversity. In other words, as individuals get older,  
441 the adversity associated with low status disproportionately increases inflammation, which  
442 may accelerate the onset of aging-related diseases and early mortality, which might help  
443 to explain why low status is associated with shorter lifespan in this population (46, 47).  
444 This also provides a novel addition to previous work that established links between social  
445 adversity and inflammation in humans and rhesus macaques (48, 49).

446

447 In conclusion, our results demonstrate that, at the level of circulating immune cell  
448 proportions, macaques and humans exhibit very similar age-related changes indicating  
449 both immunosenescence and inflammaging. Sex differences in these patterns indicate  
450 that the immune system has evolved similarly in different species and that responses are  
451 conserved between them, with females typically presenting a better and more effective  
452 adaptive immune response. Furthermore, we report that low social status is associated  
453 with a stronger increase in inflammation with aging. Although we found age-related  
454 changes in both adaptive and innate immune cells, we did not measure specific adaptive  
455 immune cells, such as the effector and memory subsets of B cells and T cells, which can  
456 change with age. In future studies, it will be important to measure other innate immune  
457 cell types, such as dendritic cells and granulocytes, because these cell types are key to  
458 the antigen presentation process and adaptive immune response development. While we  
459 found an interaction between age and social status, we were limited by our sample size \  
460 and it would be interesting to evaluate what other interactions or additive effects are  
461 present when the number of individuals in the status dataset is increased. Overall, our  
462 study provides further evidence that rhesus macaques are an ideal non-human primate  
463 model in which to study chronological aging, and are also an excellent system in which  
464 to study the effects that social adversity can have on biological aging. Future research



465 should seek to evaluate the performance of the immune cell types reported here on an  
466 infection, and how both age and social adversity mediate that response.

467

468 *Ethical note:*

469 This work was approved by the Institutional Animal Care and Use Committees of the  
470 University of Puerto Rico, Medical Sciences Campus (IACUC Number: A400117).

471 *Acknowledgements:*

472 We thank the Caribbean Primate Research Center for their help in collecting data,  
473 especially Giselle Caraballo Cruz, and Nahiri Rivera barreto; Crisanta Serrano and  
474 Stephanie Dorta for laboratory advice; Corbin SC Johnson, Laura Newman, Alice Baniel,  
475 India Schneider-Crease, Kenneth Chiou, Trish Zintel, and [and other members of the  
476 Snyder-Mackler, Sariol, Higham, Platt, and Brent labs] for helpful discussions. This work  
477 was supported by the National Institutes of Health (R01-AG060931-02S2; R01-  
478 MH118203; R00-AG051764; R01-AG060931; P40-OD012217; R01-MH118203, R01-  
479 MH096875) and NIGMS RISE Program (R25GM061838) of UPR - Medical Sciences  
480 Campus. Part of Figure 1, panel a was created with [BioRender.com](#).

481

482 *Author contributions:*

483 M.R.S.R., M.L.P., J.P.H., L.J.N.B., C.A.S., M.J.M, M.L.P., and N.S.-M designed research;  
484 M.R.S.R., N.M.R., M.M.W., P.P., M.A.P.-F., E.R.S., E.B.C., J.E.N.-D., D.P., A.R.L., and  
485 M.J.M. performed research; M.R.S.R and N.S.-M. analyzed data; and M.S.R. and N.S.-  
486 M. wrote the paper with contributions from all authors.

487 The authors declare no competing interest.

488

489

490  
491  
492  
493  
494  
495  
496  
497  
498  
499  
500  
501  
502  
503  
504  
505  
506  
507  
508  
509  
510  
511  
512  
513  
514  
515  
516  
517  
518  
519

## References

1. Strait, J. B., & Lakatta, E. G. (2012). Aging-associated cardiovascular changes and their relationship to heart. <https://doi.org/10.1016/j.hfc.2011.08.011>
2. Yung, R. L., & Julius, A. (2008). Epigenetics, aging, and autoimmunity. *Autoimmunity*, 41(4), 329-335. <https://doi.org/10.1080/08916930802024889>
3. Koh, S. H., Choi, S. H., Jeong, J. H., Jang, J. W., Park, K. W., Kim, E. J., ... & Kang, S. (2020). Telomere shortening reflecting physical aging is associated with cognitive decline and dementia conversion in mild cognitive impairment due to Alzheimer's disease. *Aging (Albany NY)*, 12(5), 4407. <https://doi.org/10.18632/aging.102893>
4. Hearps, A. C., Martin, G. E., Angelovich, T. A., Cheng, W. J., Maisa, A., Landay, A. L., ... & Crowe, S. M. (2012). Aging is associated with chronic innate immune activation and dysregulation of monocyte phenotype and function. *Aging cell*, 11(5), 867-875. <https://doi.org/10.1111/j.1474-9726.2012.00851.x>
5. Giefing-Kröll, C., Berger, P., Lepperdinger, G., & Grubeck-Loebenstein, B. (2015). How sex and age affect immune responses, susceptibility to infections, and response to vaccination. *Aging cell*, 14(3), 309-321. <https://doi.org/10.1111/accel.12326>
6. Klein, S. L., & Flanagan, K. L. (2016). Sex differences in immune responses. *Nature Reviews Immunology*, 16(10), 626-638. <https://doi.org/10.1038/nri.2016.90>
7. Gubbels Bupp, M. R., Potluri, T., Fink, A. L., & Klein, S. L. (2018). The confluence of sex hormones and aging on immunity. *Frontiers in immunology*, 9, 1269. <https://doi.org/10.3389/fimmu.2018.01269>
8. Pantell, M., Rehkopf, D., Jutte, D., Syme, S. L., Balmes, J., & Adler, N. (2013). Social isolation: a predictor of mortality comparable to traditional clinical risk factors. *American journal of public health*, 103(11), 2056-2062. <https://doi.org/10.2105/AJPH.2013.301261>
9. Fiorito, G., Polidoro, S., Dugué, P. A., Kivimaki, M., Ponzi, E., Matullo, G., ... & Vineis, P. (2017). Social adversity and epigenetic aging: a multi-cohort study on socioeconomic differences in peripheral blood DNA methylation. *Scientific reports*, 7(1), 1-12. <https://doi.org/10.1038/s41598-017-16391-5>

- 520 10. Ridout, K. K., Levandowski, M., Ridout, S. J., Gantz, L., Goonan, K., Palermo, D., ...  
521 & Tyrka, A. R. (2018). Early life adversity and telomere length: a meta-analysis.  
522 *Molecular psychiatry*, 23(4), 858-871. <https://doi.org/10.1038/mp.2017.26>
- 523 11. Snyder-Mackler, N., Sanz, J., Kohn, J. N., Brinkworth, J. F., Morrow, S., Shaver, A.  
524 O., ... & Barreiro, L. B. (2016). Social status alters immune regulation and response  
525 to infection in macaques. *Science*, 354(6315), 10411045.  
526 <https://doi.org/10.1126/science.aah3580>
- 527 12. Elwenspoek, M. M., Hengesch, X., Leenen, F. A., Schritz, A., Sias, K., Schaan, V. K.,  
528 ... & Muller, C. P. (2017). Proinflammatory T cell status associated with early life  
529 adversity. *The Journal of Immunology*, 199(12), 4046-4055.  
530 <https://doi.org/10.4049/jimmunol.1701082>
- 531 13. Roth, G. S., Mattison, J. A., Ottinger, M. A., Chachich, M. E., Lane, M. A., & Ingram,  
532 D. K. (2004). Aging in rhesus monkeys: relevance to human health interventions.  
533 *Science*, 305(5689), 1423-1426. <https://doi.org/10.1126/science.1102541>
- 534 14. Chiou, K. L., Montague, M. J., Goldman, E. A., Watowich, M. M., Sams, S. N., Song,  
535 J., ... & Snyder-Mackler, N. (2020). Rhesus macaques as a tractable physiological  
536 model of human ageing. *Philosophical Transactions of the Royal Society B*,  
537 375(1811), 20190612. <https://doi.org/10.1098/rstb.2019.0612>
- 538 15. Snyder-Mackler, N., Burger, J. R., Gaydosh, L., Belsky, D. W., Noppert, G. A.,  
539 Campos, F. A., ... & Tung, J. (2020). Social determinants of health and survival in  
540 humans and other animals. *Science*, 368(6493).  
541 <https://doi.org/10.1126/science.aax9553>
- 542 16. Ridout, K. K., Levandowski, M., Ridout, S. J., Gantz, L., Goonan, K., Palermo, D., ...  
543 & Tyrka, A. R. (2018). Early life adversity and telomere length: a meta-analysis.  
544 *Molecular psychiatry*, 23(4), 858-871. <https://doi.org/10.1038/mp.2017.26>
- 545 17. Pavez-Fox, M. A., Negron-Del Valle, J. E., Thompson, I. J., Walker, C. S., Bauman,  
546 S. E., Gonzalez, O., ... & Brent, L. J. (2021). Sociality predicts individual variation in  
547 the immunity of free-ranging rhesus macaques. *Physiology & behavior*, 241,  
548 113560. <https://doi.org/10.1016/j.physbeh.2021.113560>
- 549 18. Podsakoff, P. M., MacKenzie, S. B., Lee, J. Y., & Podsakoff, N. P. (2003). Common  
550 method biases in behavioral research: a critical review of the literature and

- 551 recommended remedies. *Journal of applied psychology*, 88(5), 879.  
552 <https://doi.org/10.1037/0021-9010.88.5.879>
- 553 19. Durmaz, A., Dursun, İ., & Kabadayi, E. T. (2020). Mitigating the effects of social  
554 desirability bias in self-report surveys: Classical and new techniques. In *Applied*  
555 *Social Science Approaches to Mixed Methods Research* (pp. 146-185). IGI Global.  
556 <https://doi.org/10.4018/978-1-7998-1025-4.ch007>
- 557 20. Clutton-Brock, T. (2016). *Mammal societies*. John Wiley & Sons.  
558 <https://doi.org/10.1093/jmammal/gyx078>
- 559 21. Brent, L. J., MacLarnon, A., Platt, M. L., & Semple, S. (2013). Seasonal changes in  
560 the structure of rhesus macaque social networks. *Behavioral Ecology and*  
561 *Sociobiology*, 67(3), 349-359. <https://doi.org/10.1007/s00265-012-1455-8>
- 562 22. Chancellor, R. L., & Isbell, L. A. (2008). Punishment and competition over food in  
563 captive rhesus macaques, *Macaca mulatta*. *Animal Behaviour*, 75(6), 1939-1947.  
564 <https://doi.org/10.1016/j.anbehav.2007.11.007>
- 565 23. Kulik, L., Amici, F., Langos, D., & Widdig, A. (2015). Sex differences in the  
566 development of social relationships in rhesus macaques (*Macaca mulatta*).  
567 *International journal of primatology*, 36(2), 353-376. [https://doi.org/10.1007/s10764-](https://doi.org/10.1007/s10764-015-9826-4)  
568 [015-9826-4](https://doi.org/10.1007/s10764-015-9826-4)
- 569 24. Vandeleest, J. J., Winkler, S. L., Beisner, B. A., Hannibal, D. L., Atwill, E. R., &  
570 McCowan, B. (2020). Sex differences in the impact of social status on hair cortisol  
571 concentrations in rhesus monkeys (*Macaca mulatta*). *American journal of*  
572 *primatology*, 82(1), e23086. <https://doi.org/10.1002/ajp.23086>
- 573 25. Van Noordwijk, M. A., & van Schaik, C. P. (2004). Sexual selection and the careers  
574 of primate males: paternity concentration, dominance–acquisition tactics and  
575 transfer decision. *Sexual selection in primates: New and comparative perspectives*,  
576 208-229. <https://doi.org/10.1017/CBO9780511542459.014>
- 577 26. Kimock, C. M., Dubuc, C., Brent, L. J., & Higham, J. P. (2019). Male morphological  
578 traits are heritable but do not predict reproductive success in a sexually-dimorphic  
579 primate. *Scientific reports*, 9(1), 1-11. <https://doi.org/10.1038/s41598-019-52633-4>

- 580 27. Brent, L. J. N., Semple, S., Dubuc, C., Heistermann, M., & MacLarnon, A. (2011).  
581 Social capital and physiological stress levels in free-ranging adult female rhesus  
582 macaques. *Physiology & behavior*, 102(1), 76-83.
- 583 28. Madlon-Kay, S., Brent, L., Montague, M., Heller, K., & Platt, M. (2017). Using machine  
584 learning to discover latent social phenotypes in free-ranging macaques. *Brain*  
585 *sciences*, 7(7), 91. <https://doi.org/10.3390/brainsci7070091>
- 586 29. Vignali, D. A., Collison, L. W., & Workman, C. J. (2008). How regulatory T cells work.  
587 *Nature reviews immunology*, 8(7), 523-532. <https://doi.org/10.1038/nri2343>
- 588 30. Idzkowska, E., Eljaszewicz, A., Miklasz, P., Musial, W. J., Tycinska, A. M., &  
589 Moniuszko, M. (2015). The role of different monocyte subsets in the pathogenesis  
590 of atherosclerosis and acute coronary syndromes. *Scandinavian journal of*  
591 *immunology*, 82(3), 163-173. <https://doi.org/10.1111/sji.12314>
- 592 31. Erkeller-Yuksel, F. M., Deneys, V., Yuksel, B., Hannet, I., Hulstaert, F., Hamilton, C.,  
593 ... & Lydyard, P. M. (1992). Age-related changes in human blood lymphocyte  
594 subpopulations. *The Journal of pediatrics*, 120(2), 216-222.  
595 [https://doi.org/10.1016/S0022-3476\(05\)80430-5](https://doi.org/10.1016/S0022-3476(05)80430-5)
- 596 32. Frasca, D., Blomberg, B. B., Garcia, D., Keilich, S. R., & Haynes, L. (2020). Age-  
597 related factors that affect B cell responses to vaccination in mice and humans.  
598 *Immunological reviews*, 296(1), 142-154. <https://doi.org/10.1111/imr.12864>
- 599 33. Germain, C., Gnjatic, S., Tamzalit, F., Knockaert, S., Remark, R., Goc, J., ... & Dieu-  
600 Nosjean, M. C. (2014). Presence of B cells in tertiary lymphoid structures is  
601 associated with a protective immunity in patients with lung cancer. *American journal*  
602 *of respiratory and critical care medicine*, 189(7), 832-844.  
603 <https://doi.org/10.1164/rccm.201309-1611OC>
- 604 34. Asquith, M., Habberth, K., Brown, M., Engelmann, F., Murphy, A., Al-Mahdi, Z., &  
605 Messaoudi, I. (2012). Age-dependent changes in innate immune phenotype and  
606 function in rhesus macaques (*Macaca mulatta*). *Pathobiology of Aging & Age-related*  
607 *Diseases*, 2(1), 18052. <https://doi.org/10.3402/pba.v2i0.18052>
- 608 35. Zheng, H. Y., Zhang, M. X., Pang, W., & Zheng, Y. T. (2014). Aged Chinese rhesus  
609 macaques suffer severe phenotypic T-and B-cell aging accompanied with sex

- 610 differences. *Experimental gerontology*, 55, 113-119.  
611 <https://doi.org/10.1016/j.exger.2014.04.004>
- 612 36. Quinn, K. M., Fox, A., Harland, K. L., Russ, B. E., Li, J., Nguyen, T. H., ... & La Gruta,  
613 N. L. (2018). Age-related decline in primary CD8+ T cell responses is associated  
614 with the development of senescence in virtual memory CD8+ T cells. *Cell reports*,  
615 23(12), 3512-3524. <https://doi.org/10.1016/j.celrep.2018.05.057>
- 616 37. Seder, R. A., & Ahmed, R. (2003). Similarities and differences in CD4+ and CD8+  
617 effector and memory T cell generation. *Nature immunology*, 4(9), 835-842.  
618 <https://doi.org/10.1038/ni969>
- 619 38. Mogilenko, D. A., Shpynov, O., Andhey, P. S., Arthur, L., Swain, A., Esaulova, E., ...  
620 & Artyomov, M. N. (2021). Comprehensive profiling of an aging immune system  
621 reveals clonal GZMK+ CD8+ T cells as conserved hallmark of inflammaging.  
622 *Immunity*, 54(1), 99-115. <https://doi.org/10.1016/j.immuni.2020.11.005>
- 623 49. Rocamora-Reverte, L., Melzer, F. L., Würzner, R., & Weinberger, B. (2020). The  
624 complex role of regulatory T cells in immunity and aging. *Frontiers in Immunology*,  
625 11. <https://doi.org/10.3389/fimmu.2020.616949>
- 626 40. Kapellos, T. S., Bonaguro, L., Gemünd, I., Reusch, N., Saglam, A., Hinkley, E. R., &  
627 Schultze, J. L. (2019). Human monocyte subsets and phenotypes in major chronic  
628 inflammatory diseases. *Frontiers in immunology*, 10, 2035.  
629 <https://doi.org/10.3389/fimmu.2019.02035>
- 630 41. Italiani, P., & Boraschi, D. (2014). From monocytes to M1/M2 macrophages:  
631 phenotypical vs. functional differentiation. *Frontiers in immunology*, 5, 514.  
632 <https://doi.org/10.3389/fimmu.2014.00514>
- 633 42. Naicker, S. D., Cormican, S., Griffin, T. P., Maretto, S., Martin, W. P., Ferguson, J. P.,  
634 ... & Griffin, M. D. (2018). Chronic kidney disease severity is associated with  
635 selective expansion of a distinctive intermediate monocyte subpopulation. *Frontiers*  
636 *in immunology*, 9, 2845. <https://doi.org/10.3389/fimmu.2018.02845>
- 637 43. Bongen, E., Lucian, H., Khatri, A., Fragiadakis, G. K., Bjornson, Z. B., Nolan, G. P.,  
638 ... & Khatri, P. (2019). Sex differences in the blood transcriptome identify robust  
639 changes in immune cell proportions with aging and influenza infection. *Cell reports*,  
640 29(7), 1961-1973. <https://doi.org/10.1016/j.celrep.2019.10.019>

- 641 44. DiPiazza, A., Richards, K. A., Knowlden, Z. A., Nayak, J. L., & Sant, A. J. (2016). The  
642 role of CD4 T cell memory in generating protective immunity  
643 <https://doi.org/10.3389/fimmu.2016.00010>
- 644 45. Fischinger, S., Boudreau, C. M., Butler, A. L., Streeck, H., & Alter, G. (2019, March).  
645 Sex differences in vaccine-induced humoral immunity. In *Seminars in*  
646 *immunopathology* (Vol. 41, No. 2, pp. 239-249). Springer Berlin Heidelberg.  
647 <https://doi.org/10.1007/s00281-018-0726-5>
- 648 46. Ellis, S., Snyder-Mackler, N., Ruiz-Lambides, A., Platt, M. L., & Brent, L. J. (2019).  
649 Deconstructing sociality: the types of social connections that predict longevity in a  
650 group-living primate. *Proceedings of the Royal Society B*, 286(1917), 20191991.  
651 <https://doi.org/10.1098/rspb.2019.1991>
- 652 47. Brent, L. J., Ruiz-Lambides, A., & Platt, M. L. (2017). Family network size and survival  
653 across the lifespan of female macaques. *Proceedings of the Royal Society B:*  
654 *Biological Sciences*, 284(1854), 20170515. <https://doi.org/10.1098/rspb.2017.0515>
- 655 48. Powell, N. D., Sloan, E. K., Bailey, M. T., Arevalo, J. M., Miller, G. E., Chen, E., ... &  
656 Cole, S. W. (2013). Social stress up-regulates inflammatory gene expression in the  
657 leukocyte transcriptome via  $\beta$ -adrenergic induction of myelopoiesis. *Proceedings of*  
658 *the National Academy of Sciences*, 110(41), 16574-16579.  
659 <https://doi.org/10.1073/pnas.1310655110>
- 660 49. Kinnally, E. L., Martinez, S. J., Chun, K., Capitano, J. P., & Ceniceros, L. C. (2019).  
661 early social stress promotes Inflammation and Disease Risk in Rhesus Monkeys.  
662 *Scientific reports*, 9(1), 1-8. <https://doi.org/10.1038/s41598-019-43750-1>
